# Supplementary material for: The luminescent properties of CuAlO2
Source: Royal Society of Chemistry journal article supplement (doi:10.1039/c4tc01311e), 2014-01-01
Supplement: c4tc01311e1.pdf [file c4tc01311e1.pdf]

# The Luminescent Properties of $\text{CuAlO}_2$

Daragh Byrne,<sup>1\*</sup> Aidan Cowley,<sup>2,3</sup> Nick Bennett,<sup>4</sup> Enda McGlynn.<sup>1</sup>

\*Author to whom correspondence should be addressed: daragh.byrne2@mail.dcu.ie

## Supporting information

### Sample Preparation

#### Preparation of $\text{CuAlO}_2$ films on $\text{Al}_2\text{O}_3$

$\text{Al}_2\text{O}_3$  plates were first cleaned. A few crystals of copper nitrate were placed on the surface of the substrate which was then heated to  $150^\circ\text{C}$  on a hotplate. When the nitrate salt melted, a small pin was used to paint the entire substrate with the molten salt. Over the course of 15 minutes the temperature was increased to  $300^\circ\text{C}$  to decompose the nitrate, leaving a  $\text{CuO}$  film on the substrate surface. The coated substrate was then inserted into a pre-heated furnace at  $1100^\circ\text{C}$  and heating continued for a further 5 hours. The substrates were quickly removed from the furnace under a stream of nitrogen and cooled to room temperature. Excess  $\text{Cu}_x\text{O}$  was removed by soaking the substrate in 36%  $\text{HCl}$  for 10 minutes, rinsing with fresh  $\text{HCl}$ ,  $\text{DI-H}_2\text{O}$  and drying at  $60^\circ\text{C}$  for 1 hour. The substrates were then for a further 3 hours at  $1100^\circ\text{C}$ , after which the film appearance changed from black to a light grey colour.

#### 2.3 Preparation of $\text{CuAlO}_2$ films on polycrystalline $\text{Cu}_2\text{O}$

$\text{Cu}_2\text{O}$  substrates were prepared in a manner similar to that described elsewhere.<sup>1</sup>  $\text{Cu}$  sheets were oxidised in a pre-heated furnace at  $1030^\circ\text{C}$  for 1 hour and at  $1100^\circ\text{C}$  for a further 2 hours. Post annealing, the polycrystalline  $\text{Cu}_2\text{O}$  substrates were polished with successively finer grades of commercial silicon carbide paper to remove surface buckling that occurs during oxidation. The  $\text{Cu}_2\text{O}$  plates were then finally briefly etched in a  $\text{H}_2\text{O}_2$ : 25 /  $\text{H}_2\text{SO}_4$ : 75 mixtures and quickly rinsed with copious amounts of  $\text{DI-H}_2\text{O}$ .

A 0.6% w/w Boehmite ( $\text{AlOOH}$ ) sol was prepared from aluminium isopropoxide (AIP) using methods developed by Nagai *et al.*<sup>2</sup> The Boehmite sol was drop-coated onto the  $\text{Cu}_2\text{O}$  substrates prepared as described in section 2.1 and allowed to gel and finally dried on a hot plate at  $70^\circ\text{C}$ , after which the samples were pre-annealed at  $350^\circ\text{C}$  for 15 minutes. The substrates were then annealed at  $1100^\circ\text{C}$  in a pre-heated furnace for 5 hours before being removed and quickly cooled using a nitrogen stream yielding a pale blue film on the  $\text{Cu}_2\text{O}$  substrate.



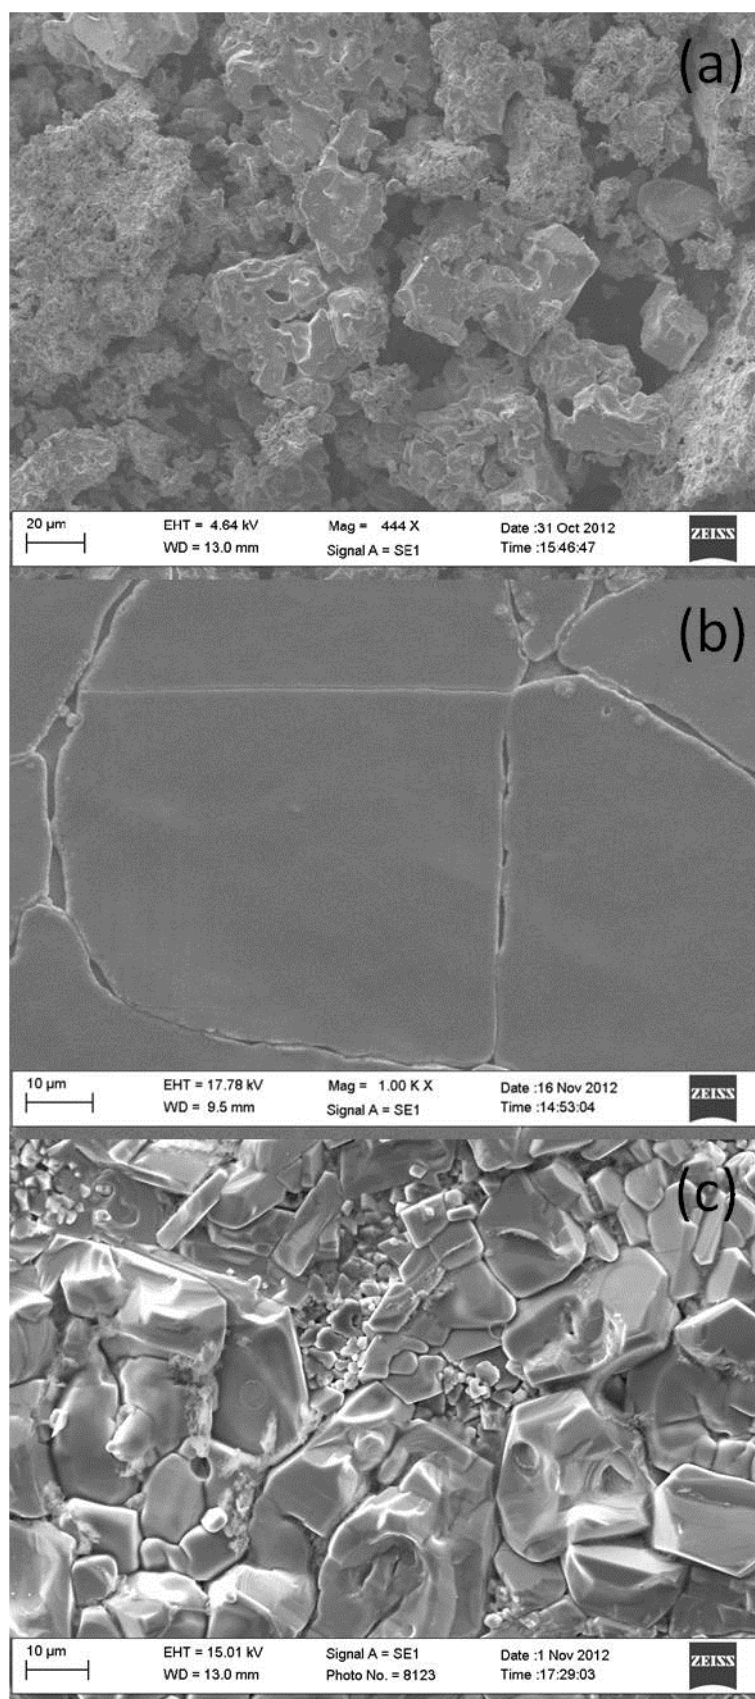

Figure S1: SEM images of (a) CuAlO<sub>2</sub> powder (b) CuAlO<sub>2</sub> film on a Cu<sub>2</sub>O substrate (c) CuAlO<sub>2</sub> film on an Al<sub>2</sub>O<sub>3</sub> substrate.



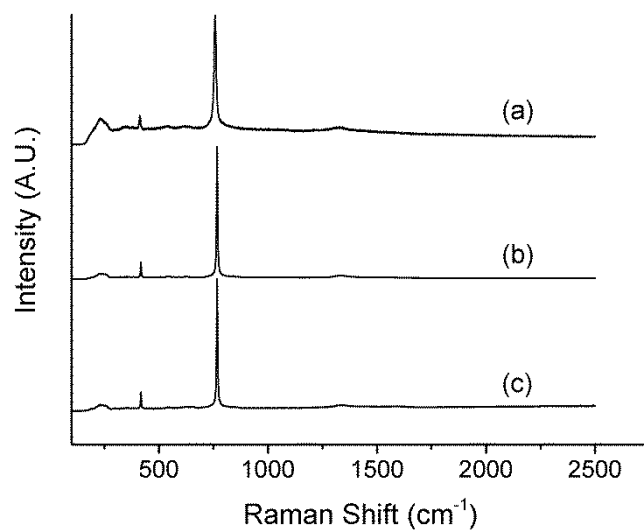

Figure S2: Raman spectrum from  $\text{CuAlO}_2$  samples acquired using 363.8 nm laser excitation (a) powder (b) film on  $\text{Cu}_2\text{O}$  substrate (c) film on  $\text{Al}_2\text{O}_3$  substrate.

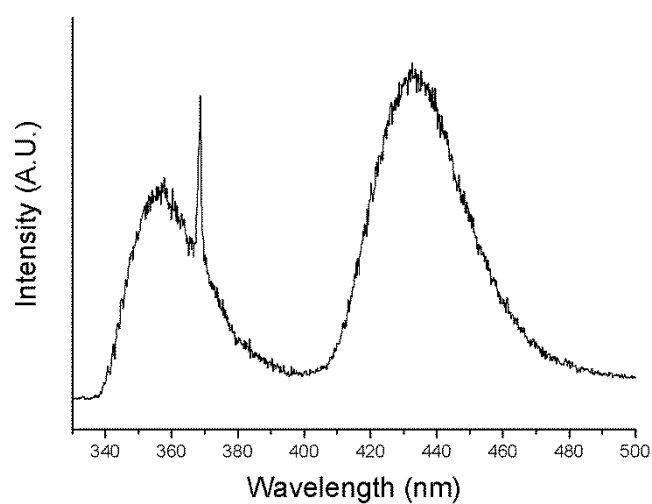

Figure S3: Photoluminescence spectra of a  $\text{CuAlO}_2$  film on  $\text{Cu}_2\text{O}$  substrate measured at 14.5K



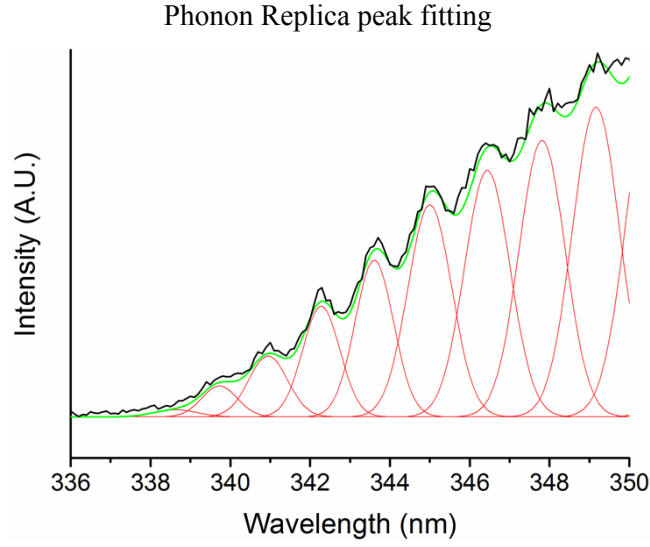

Figure S4: Gaussian peak fit of the successive phonon replicas of the UV emission band. Black line: PL spectrum, Green line: sum of individual Gaussian peaks, Red lines: individual peaks.

Each resolvable peak on the high energy side of the UV band was fitted to a Gaussian peak shape until an adjusted R-Square value of greater than 0.99 was achieved. In the Harmonic oscillator model the intensities of successive phonon peak intensities are given by:

$$I_n = Ae^{-S} \frac{S^n}{n!}$$

Therefore the ratio of successive phonon intensities is given by:

$$\frac{I_n}{I_{n+1}} = \frac{(n+x)+1}{S}$$

Where x is an additional degree of freedom included given that the initial zero phonon line could not be observed. The ratio of success phonon replicates were plotted given an arbitrary phonon number assignment and fitted to the above equation as shown below, yielding a Huang Rhys factor of  $8.7 \pm 1.2$  with a zero phonon line position of  $\sim 337.3$  nm ( 3.68 eV)



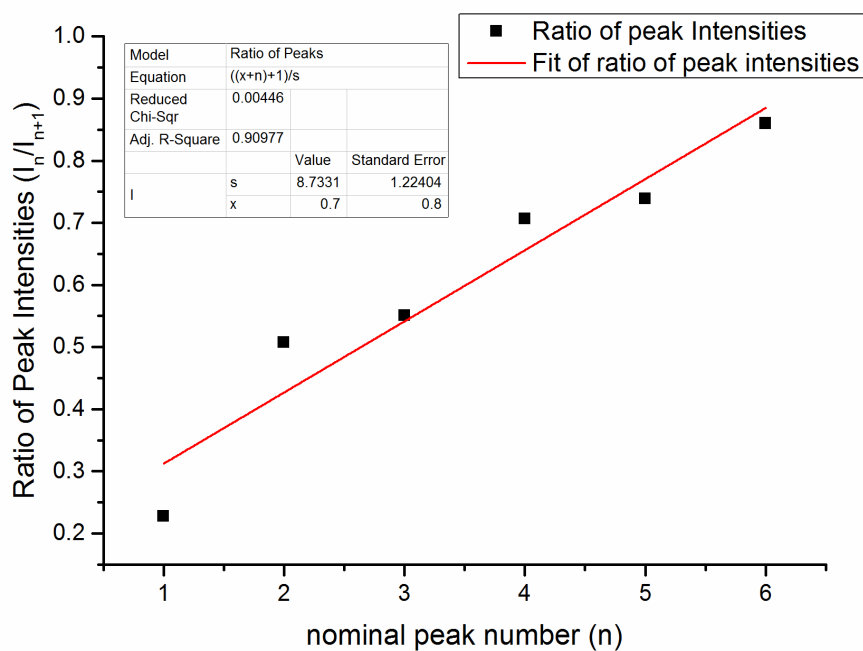

Figure S5: Fit of the ratio of the integrated intensity for successive phonon modes observed in the low temperature UV luminescence band from  $\text{CuAlO}_2$ .

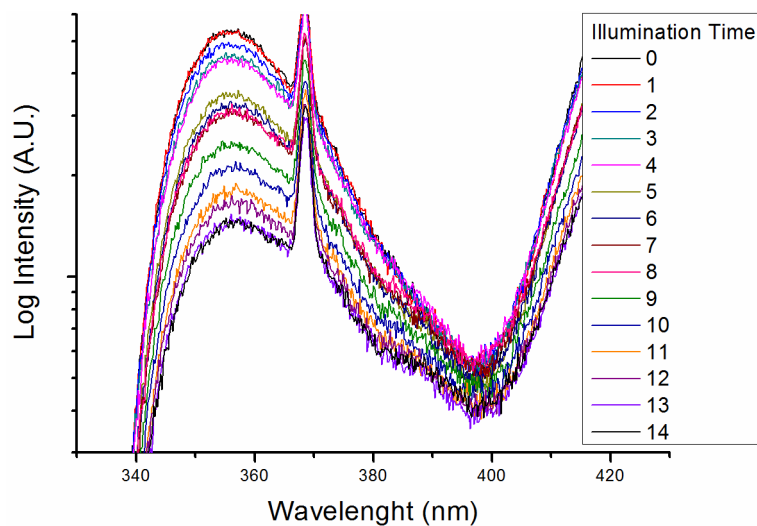

Figure S6: Overlaid PL spectra from a  $\text{CuAlO}_2$  sample illuminated continuously for 14 hours, showing the decrease in the UV emission and the emergence of a shoulder on the low energy side.

## References

- (1) Toth, R. S.; Kilkson, R.; Trivich, D. *Journal of Applied Physics* **1960**, 31 (6) 1117-1121
- (2) Nagai, N.; Mizukami, F. *Journal of Materials Chemistry* **2011**, 21 (38) 14884-14889
